# Supplementary material for: Genetic and morphometric divergence in the Garnet-Throated Hummingbird Lamprolaima rhami (Aves: Trochilidae)
Source: PeerJ journal article supplement (doi:10.7717/peerj.5733), 2018-10-19
Supplement: S1.pdf [file S1.pdf]

## Supplemental information S1

Localities, geographic groups (GG), coordinates and biological collections of *Lamprolaima rhami* tissue samples.

| GG  | Collection number | State/Department | Locality              | Latitude  | Longitude | BC   |
|-----|-------------------|------------------|-----------------------|-----------|-----------|------|
| SMO | AHC042            | Puebla           | Tetela                | 19.88685  | -97.69383 | MZFC |
| SMO | AHC057            | Puebla           | Tetela                | 19.88685  | -97.69383 | MZFC |
| SMO | AHC067            | Puebla           | Tetela                | 19.88685  | -97.69383 | MZFC |
| SMO | AHC073            | Puebla           | Tetela                | 19.88685  | -97.69383 | MZFC |
| SMO | AHC077            | Puebla           | Tetela                | 19.88685  | -97.69383 | MZFC |
| SMO | CONACYT750        | Oaxaca           | Puerto de La Soledad  | 18.165    | -96.99667 | MZFC |
| SMO | CONACYT752        | Oaxaca           | Puerto de La Soledad  | 18.165    | -96.99667 | MZFC |
| SMO | CONACYT756        | Oaxaca           | Puerto de La Soledad  | 18.165    | -96.99667 | MZFC |
| SMO | CONACYT762        | Oaxaca           | Puerto de La Soledad  | 18.165    | -96.99667 | MZFC |
| SMO | CONACYT777        | Oaxaca           | Puerto de La Soledad  | 18.165    | -96.99667 | MZFC |
| SMO | CONACYT781        | Oaxaca           | Puerto de La Soledad  | 18.165    | -96.99667 | MZFC |
| SMO | OMVP006           | Oaxaca           | Puerto de La Soledad  | 18.165    | -96.99667 | MZFC |
| SMO | OMVP013           | Oaxaca           | Puerto de La Soledad  | 18.165    | -96.99667 | MZFC |
| SMO | OMVP052           | Oaxaca           | Puerto de La Soledad  | 18.165    | -96.99667 | MZFC |
| SMO | MT374             | Oaxaca           | La Esperanza          | 17.515    | -96.505   | MZFC |
| SMO | B22001            | Oaxaca           | Distrito de Cuicatlán | 17.856    | -96.6456  | MNS  |
| SMO | OMVP919           | Oaxaca           | Distrito de Cuicatlán | 17.846667 | -96.75667 | MZFC |
| SMO | OMVP959           | Oaxaca           | Distrito de Cuicatlán | 17.846667 | -96.75667 | MZFC |
| SMO | OMVP1036          | Oaxaca           | San Martín Caballero  | 18.111667 | -96.64    | MZFC |
| SMO | OMVP1067          | Oaxaca           | San Martín Caballero  | 18.111667 | -96.64    | MZFC |
| SMO | OMVP1081          | Oaxaca           | San Martín Caballero  | 18.111667 | -96.64    | MZFC |
| SMO | OMVP1113          | Oaxaca           | San Martín Caballero  | 18.111667 | -96.64    | MZFC |
| MIA | MOL15-025         | Oaxaca           | Sierra de Miahuatlán  | 16.08972  | -96.48548 | MZFC |
| MIA | MOL15-027         | Oaxaca           | Sierra de Miahuatlán  | 16.08972  | -96.48548 | MZFC |
| GRO | AMT049            | Guerrero         | Carrizal de Bravo     | 17.676111 | -99.88194 | MZFC |
| GRO | AMT133            | Guerrero         | Carrizal de Bravo     | 17.676111 | -99.88194 | MZFC |
| GRO | AMT155            | Guerrero         | Carrizal de Bravo     | 17.676111 | -99.88194 | MZFC |

|      |           |                |                                        |           |           |      |
|------|-----------|----------------|----------------------------------------|-----------|-----------|------|
| GRO  | ATO117    | Guerrero       | Carrizal de Bravo                      | 17.676111 | -99.88194 | MZFC |
| GRO  | ATO120    | Guerrero       | Carrizal de Bravo                      | 17.676111 | -99.88194 | MZFC |
| GRO  | MOLGRO164 | Guerrero       | Carrizal de Bravo                      | 17.58668  | -99.83707 | MZFC |
| GRO  | MOLGRO177 | Guerrero       | Carrizal de Bravo                      | 17.58668  | -99.83707 | MZFC |
| GRO  | MOLGRO195 | Guerrero       | Carrizal de Bravo                      | 17.58668  | -99.83707 | MZFC |
| GRO  | MOLGRO231 | Guerrero       | Carrizal de Bravo                      | 17.58668  | -99.83707 | MZFC |
| CHIS | MOL13-052 | Chiapas        | Cerro Huitepec                         | 16.738056 | -92.68806 | MZFC |
| CHIS | MOL13-076 | Chiapas        | Cerro Huitepec                         | 16.738056 | -92.68806 | MZFC |
| CHIS | MOL13-119 | Chiapas        | Cerro Huitepec                         | 16.738056 | -92.68806 | MZFC |
| CHIS | MOL13-132 | Chiapas        | Cerro Huitepec                         | 16.738056 | -92.68806 | MZFC |
| CHIS | MOL13-297 | Chiapas        | Cerro Huitepec                         | 16.738056 | -92.68806 | MZFC |
| CHIS | EAGT809   | Chiapas        | Cerro Mozotal                          | 15.42     | -92.34    | MZFC |
| CHIS | EAGT813   | Chiapas        | Cerro Mozotal                          | 15.42     | -92.34    | MZFC |
| CHIS | EAGT818   | Chiapas        | Cerro Mozotal                          | 15.42     | -92.34    | MZFC |
| CHIS | ZRH397    | Chiapas        | Cerro Mozotal                          | 15.42     | -92.34    | MZFC |
| CHIS | ZRH1008   | Chiapas        | Cerro Mozotal                          | 15.42     | -92.34    | MZFC |
| CHIS | CRGA035   | Chiapas        | Cerro Boquerón                         | 15.23     | -92.30    | MZFC |
| CHIS | EAGT828   | Chiapas        | Cerro Boquerón                         | 15.23     | -92.30    | MZFC |
| CHIS | ZRH418    | Chiapas        | Cerro Boquerón                         | 15.23     | -92.30    | MZFC |
| CHIS | ZRH419    | Chiapas        | Cerro Boquerón                         | 15.23     | -92.30    | MZFC |
| CHIS | BMM875    | Chiapas        | Volcán Tacaná                          | 15.06667  | -92.08333 | MZFC |
| CHIS | BMM877    | Chiapas        | Volcán Tacaná                          | 15.06667  | -92.08333 | MZFC |
| CHIS | BONA90    | Chiapas        | Volcán Tacaná                          | 15.06667  | -92.08333 | MZFC |
| CHIS | MVZ184738 | El Progreso    | Las Cabañas de Albores, Cerro Pinalón. | 15.08385  | -89.94305 | MVZ  |
| CHIS | RAJ101    | Quetzaltenango | Zunil                                  | 14.748512 | -91.48001 | MVZ  |
| CHIS | JF2859    | El Quiche      | Chimel, Uspatan.                       | 15.46670  | -90.7764  | MVZ  |
| CHIS | ZRH789    | El Quiche      | Chimel, Uspatan.                       | 15.46670  | -90.7764  | MVZ  |

BC: Biological Collection.

MZFC: Museo de Zoología, Facultad de Ciencias (Alfonso L. Herrera), Universidad Nacional Autónoma de México.

MNS: Museum of Natural Science, Louisiana State University.

MVZ: Museum of Vertebrate Zoology, University of California Berkeley.
