# Supplementary material for: Genetic and morphometric divergence in the Garnet-Throated Hummingbird Lamprolaima rhami (Aves: Trochilidae)
Source: PeerJ journal article supplement (doi:10.7717/peerj.5733), 2018-10-19
Supplement: S2.pdf [file S2.pdf]

## Supplemental information S2

Localities, geographic groups (GG), coordinates and biological collections of *Lamprolaima rhami* voucher specimens used for morphometric measurements. Map: vouchers from localities with data of geographic coordinates.

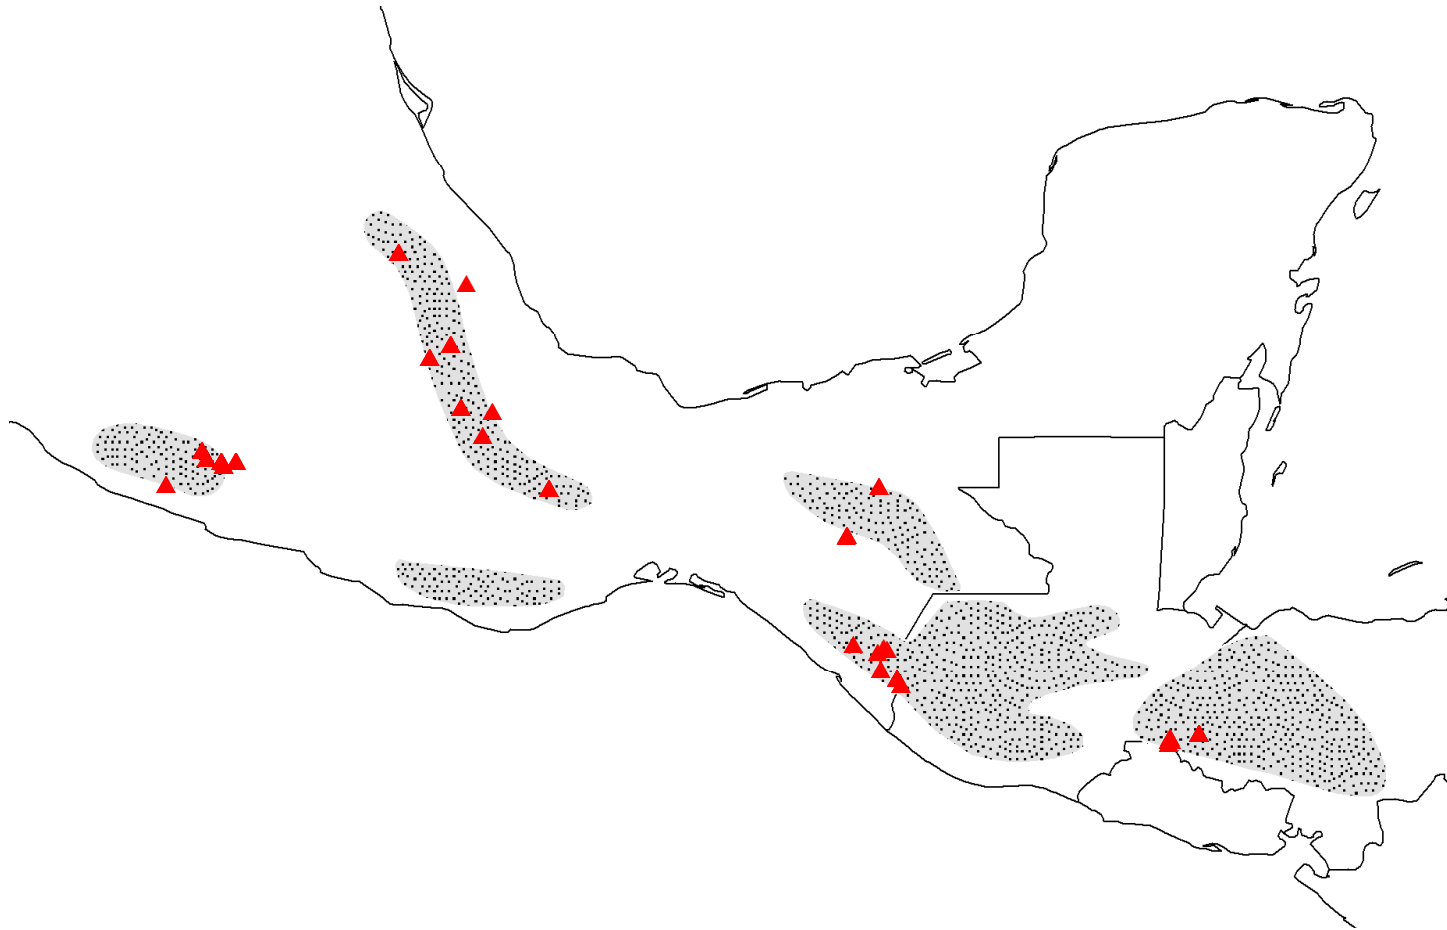

| <b>GG</b> | <b>ID</b>  | <b>State/Department</b> | <b>Locality</b>                     | <b>Latitude</b> | <b>Longitude</b> | <b>BC</b> | <b>SEX</b> |
|-----------|------------|-------------------------|-------------------------------------|-----------------|------------------|-----------|------------|
| SMO       | AHC067     | Puebla                  | Tetela                              | 19.88           | -97.69           | MZFC      | M          |
| SMO       | AHC073     | Puebla                  | Tetela                              | 19.88           | -97.69           | MZFC      | M          |
| SMO       | AHC077     | Puebla                  | Tetela                              | 19.88           | -97.69           | MZFC      | M          |
| SMO       | AHC184     | Puebla                  | Tetela                              | 19.88           | -97.69           | MZFC      | M          |
| SMO       | 46308      | Veracruz                | Jalapa de Oca                       | ND              | ND               | AMNH      | M          |
| SMO       | 46309      | Veracruz                | Jalapa                              | ND              | ND               | AMNH      | M          |
| SMO       | 10308      | Veracruz                | Orizaba                             | 18.851014       | -97.100839       | MLZ       | M          |
| SMO       | 33014      | Veracruz                | La Puerta, 31 mi SW Orizaba by road | 18.714682       | -97.338439       | MLZ       | M          |
| SMO       | 33018      | Veracruz                | La Puerta, 31 mi SW Orizaba by road | 18.714682       | -97.338439       | MLZ       | M          |
| SMO       | 33289      | Veracruz                | La Puerta, 31 mi SW Orizaba by road | 18.714682       | -97.338439       | MLZ       | M          |
| SMO       | 33290      | Veracruz                | La Puerta, 31 mi SW Orizaba by road | 18.714682       | -97.338439       | MLZ       | M          |
| SMO       | 32951      | Veracruz                | La Puerta, 31 mi SW Orizaba by road | 18.714682       | -97.338439       | MLZ       | M          |
| SMO       | 12286      | Veracruz                | Vicinity of Coatepec                | 19.5456514      | -96.9285929      | MCZ       | M          |
| SMO       | 31864      | Veracruz                | Orizaba                             | 18.8506857      | -97.1002655      | MCZ       | M          |
| SMO       | 31865      | Veracruz                | Orizaba                             | 18.8506857      | -97.1002655      | MCZ       | M          |
| SMO       | 78508      | Veracruz                | Orizaba                             | 18.8506857      | -97.1002655      | MCZ       | M          |
| SMO       | AGNS663    | Oaxaca                  | Macuilianguis                       | -96.55          | 17.53166667      | MZFC      | M          |
| SMO       | CONACYT762 | Oaxaca                  | Puerto de La Soledad                | 18.16           | -96.99           | MZFC      | M          |
| SMO       | CONACYT781 | Oaxaca                  | Puerto de La Soledad                | 18.16           | -96.99           | MZFC      | M          |
| SMO       | OMVP1173   | Oaxaca                  | San Martín Caballero                | -96.64          | 18.11166667      | MZFC      | M          |
| SMO       | OMVP1067   | Oaxaca                  | San Martín Caballero                | 18.11           | -96.64           | MZFC      | M          |
| SMO       | OMVP959    | Oaxaca                  | Distrito de Cuicatlán               | 17.84           | -96.75           | MZFC      | M          |
| SMO       | 37225      | Oaxaca                  | Oaxaca                              | ND              | ND               | AMNH      | M          |
| SMO       | 37224      | Oaxaca                  | Oaxaca                              | ND              | ND               | AMNH      | M          |
| SMO       | 37226      | Oaxaca                  | Oaxaca                              | ND              | ND               | AMNH      | M          |
| SMO       | 793417     | Oaxaca                  | 22 mi. N. of San Juan del Estado    | ND              | ND               | AMNH      | M          |

|     |            |          |                                     |            |             |      |   |
|-----|------------|----------|-------------------------------------|------------|-------------|------|---|
| SMO | 30931      | Oaxaca   | Moctum                              | 17.247789  | -96.004919  | MLZ  | M |
| SMO | 30934      | Oaxaca   | Moctum                              | 17.247789  | -96.004919  | MLZ  | M |
| SMO | 30928      | Oaxaca   | Moctum                              | 17.247789  | -96.004919  | MLZ  | M |
| SMO | 30932      | Oaxaca   | Moctum                              | 17.247789  | -96.004919  | MLZ  | M |
| SMO | 37247      | Oaxaca   | Moctum                              | 17.247789  | -96.004919  | MLZ  | M |
| SMO | 30933      | Oaxaca   | Moctum                              | 17.247789  | -96.004919  | MLZ  | M |
| SMO | AHC042     | Puebla   | Tetela                              | 19.88      | -97.69      | MZFC | F |
| SMO | AHC057     | Puebla   | Tetela                              | 19.88      | -97.69      | MZFC | F |
| SMO | AHC164     | Puebla   | Tetela                              | 19.88      | -97.69      | MZFC | F |
| SMO | 10198      | Veracruz | Orizaba                             | 18.851014  | -97.100839  | MLZ  | F |
| SMO | 57272      | Veracruz | La Puerta, 31 mi SW Orizaba by road | 18.714682  | -97.338439  | MLZ  | F |
| SMO | 78507      | Veracruz | Orizaba                             | 18.8506857 | -97.1002655 | MCZ  | F |
| SMO | OMVP52     | Oaxaca   | Puerto de La Soledad                | 18.16      | -96.99      | MZFC | F |
| SMO | OMVP1036   | Oaxaca   | San Martín Caballero                | 18.11      | -96.64      | MZFC | F |
| SMO | OMVP919    | Oaxaca   | Distrito de Cuicatlán               | 17.84      | -96.75      | MZFC | F |
| SMO | MT244      | Oaxaca   | Brecha 60, carr. Tuxtepec-Oaxaca    | -96.513333 | 17.555      | MZFC | F |
| SMO | OMVP598    | Oaxaca   | Sierra de Huautla, Puerto Soledad   | -96.996667 | 18.165      | MZFC | F |
| SMO | OMVP13     | Oaxaca   | Puerto de La Soledad                | 18.16      | -96.99      | MZFC | F |
| SMO | CONACYT777 | Oaxaca   | Puerto de La Soledad                | 18.16      | -96.99      | MZFC | F |
| SMO | CONACYT752 | Oaxaca   | Puerto de La Soledad                | 18.16      | -96.99      | MZFC | F |
| SMO | OR01       | Oaxaca   | Puerto de la Soledad, Teotitlán     | -97.076664 | 18.13194556 | MZFC | F |
| SMO | CONACYT756 | Oaxaca   | Puerto de La Soledad                | 18.16      | -96.99      | MZFC | F |
| SMO | 37205      | Oaxaca   | Oaxaca                              | ND         | ND          | AMNH | F |
| SMO | 815327     | Oaxaca   | Río Molino                          | ND         | ND          | AMNH | F |
| SMO | 37226      | Oaxaca   | Oaxaca                              | ND         | ND          | AMNH | F |
| SMO | 30935      | Oaxaca   | Moctum                              | 17.247789  | -96.004919  | MLZ  | F |
| GRO | 163442     | Guerrero | Chilpancingo                        | 17.5507481 | -99.5003136 | MCZ  | M |
| GRO | AMT133     | Guerrero | Carrizal de Bravo                   | 17.67      | -99.88      | MZFC | M |
| GRO | ATO117     | Guerrero | Carrizal de Bravo                   | 17.67      | -99.88      | MZFC | M |

|     |           |          |                               |                 |             |      |   |
|-----|-----------|----------|-------------------------------|-----------------|-------------|------|---|
| GRO | AMT049    | Guerrero | Carrizal de Bravo             | 17.67           | -99.88      | MZFC | M |
| GRO | ATO120    | Guerrero | Carrizal de Bravo             | 17.67           | -99.88      | MZFC | M |
| GRO | 4696      | Guerrero | Omiltemi, Laguna de Agua Fría | -<br>100.066667 | 17.065      | MZFC | M |
| GRO | MOLGRO164 | Guerrero | Carrizal de Bravo             | 17.58           | -99.83      | MZFC | M |
| GRO | MOLGRO177 | Guerrero | Carrizal de Bravo             | 17.58           | -99.83      | MZFC | M |
| GRO | MFOR512   | Guerrero | ND                            | ND              | ND          | MZFC | M |
| GRO | 482605    | Guerrero | Chilpancingo                  | 17.55           | -99.5       | AMNH | M |
| GRO | 29702     | Guerrero | Coapango                      | 17.506199       | -99.636357  | MLZ  | M |
| GRO | 29703     | Guerrero | Coapango                      | 17.506199       | -99.636357  | MLZ  | M |
| GRO | 29699     | Guerrero | Coapango                      | 17.506199       | -99.636357  | MLZ  | M |
| GRO | 29697     | Guerrero | Coapango                      | 17.506199       | -99.636357  | MLZ  | M |
| GRO | 29701     | Guerrero | Coapango                      | 17.506199       | -99.636357  | MLZ  | M |
| GRO | 29698     | Guerrero | Coapango                      | 17.506199       | -99.636357  | MLZ  | M |
| GRO | 29696     | Guerrero | Coapango                      | 17.506199       | -99.636357  | MLZ  | M |
| GRO | 29700     | Guerrero | San Vicente de Benitez        | 17.297901       | -100.283612 | MLZ  | M |
| GRO | 29695     | Guerrero | San Vicente de Benitez        | 17.297901       | -100.283612 | MLZ  | M |
| GRO | 1312      | Guerrero | Chilpancingo                  | 17.550599       | -99.505783  | MLZ  | M |
| GRO | 1313      | Guerrero | Chilpancingo                  | 17.550599       | -99.505783  | MLZ  | M |
| GRO | 172633    | Guerrero | Omiltemi                      | 17.5507478      | -99.666987  | MCZ  | M |
| GRO | 172634    | Guerrero | Omiltemi                      | 17.5507478      | -99.666987  | MCZ  | M |
| GRO | 172635    | Guerrero | Omiltemi                      | 17.5507478      | -99.666987  | MCZ  | M |
| GRO | 172636    | Guerrero | Omiltemi                      | 17.5507478      | -99.666987  | MCZ  | M |
| GRO | 172639    | Guerrero | Omiltemi                      | 17.5507478      | -99.666987  | MCZ  | M |
| GRO | 172638    | Guerrero | Omiltemi                      | 17.5507478      | -99.666987  | MCZ  | M |
| GRO | 172640    | Guerrero | Omiltemi                      | 17.5507478      | -99.666987  | MCZ  | M |
| GRO | 172641    | Guerrero | Omiltemi                      | 17.5507478      | -99.666987  | MCZ  | M |
| GRO | 172642    | Guerrero | Omiltemi                      | 17.5507478      | -99.666987  | MCZ  | M |
| GRO | 172643    | Guerrero | Omiltemi                      | 17.5507478      | -99.666987  | MCZ  | M |

|      |           |          |                                      |            |             |      |   |
|------|-----------|----------|--------------------------------------|------------|-------------|------|---|
| GRO  | 172644    | Guerrero | Omiltemi                             | 17.5507478 | -99.666987  | MCZ  | M |
| GRO  | 172645    | Guerrero | Omiltemi                             | 17.5507478 | -99.666987  | MCZ  | M |
| GRO  | MOLGRO195 | Guerrero | Carrizal de Bravo                    | 17.58      | -99.83      | MZFC | F |
| GRO  | MOLGRO231 | Guerrero | Carrizal de Bravo                    | 17.58      | -99.83      | MZFC | F |
| GRO  | AGNS329   | Guerrero | Puerto el Gallo, 15.5 km NNE Paraíso | -100.16667 | 17.46666667 | MZFC | F |
| GRO  | AMT155    | Guerrero | Carrizal de Bravo                    | 17.67      | -99.88      | MZFC | F |
| GRO  | AGNS501   | Guerrero | Omiltemi, Captación Potrerillos      | -100.06667 | 17.065      | MZFC | F |
| GRO  | AGNS500   | Guerrero | Omiltemi, Laguna de Agua Fría        | -100.06667 | 17.065      | MZFC | F |
| GRO  | AGNS0192  | Guerrero | Puerto el Gallo, 15.5 km NNE Paraíso | -100.16667 | 17.46666667 | MZFC | F |
| GRO  | 3552      | Guerrero | El Iris, 3 km NE Puerto El Gallo     | -100.2     | 17.48333333 | MZFC | F |
| GRO  | 482606    | Guerrero | Chilpancingo                         | 17.55      | -99.5       | AMNH | F |
| GRO  | 482607    | Guerrero | Chilpancingo                         | 17.55      | -99.5       | AMNH | F |
| GRO  | 29571     | Guerrero | San Vicente de Benitez               | 17.297901  | -100.283612 | MLZ  | F |
| GRO  | 1315      | Guerrero | Chilpancingo                         | 17.550599  | -99.505783  | MLZ  | F |
| GRO  | 1317      | Guerrero | Chilpancingo                         | 17.550599  | -99.505783  | MLZ  | F |
| GRO  | 1314      | Guerrero | Chilpancingo                         | 17.550599  | -99.505783  | MLZ  | F |
| GRO  | 1316      | Guerrero | Chilpancingo                         | 17.550599  | -99.505783  | MLZ  | F |
| GRO  | 172637    | Guerrero | Omiltemi                             | 17.5507478 | -99.666987  | MCZ  | F |
| CHIS | EAGT809   | Chiapas  | Cerro Mozotal                        | 15.42      | -92.34      | MZFC | M |
| CHIS | BMM877    | Chiapas  | Volcán Tacaná                        | 15.06      | -92.08      | MZFC | M |
| CHIS | PEP376    | Chiapas  | Puerto del Gallo                     | -100.16667 | 17.46666667 | MZFC | M |
| CHIS | MOL13052  | Chiapas  | Cerro Huitepec                       | 16.73      | -92.68      | MZFC | M |
| CHIS | BMM875    | Chiapas  | Volcán Tacaná                        | 15.06      | -92.08      | MZFC | M |
| CHIS | MOL13119  | Chiapas  | Cerro Huitepec                       | 16.73      | -92.68      | MZFC | M |
| CHIS | EAGT813   | Chiapas  | Cerro Mozotal                        | 15.42      | -92.34      | MZFC | M |
| CHIS | MOL13132  | Chiapas  | Cerro Huitepec                       | 16.73      | -92.68      | MZFC | M |
| CHIS | 44211     | Chiapas  | Tumbala                              | 17.279187  | -92.316808  | MLZ  | M |
| CHIS | 44212     | Chiapas  | Tumbala                              | 17.279187  | -92.316808  | MLZ  | M |
| CHIS | 36977     | Chiapas  | Volcan Tacana                        | 15.123741  | -92.119715  | MLZ  | M |

|      |          |                        |                                       |            |             |      |   |
|------|----------|------------------------|---------------------------------------|------------|-------------|------|---|
| CHIS | 37484    | Chiapas                | Volcan Tacana                         | 15.123741  | -92.119715  | MLZ  | M |
| CHIS | 37485    | Chiapas                | Volcan Tacana                         | 15.123741  | -92.119715  | MLZ  | M |
| CHIS | 37486    | Chiapas                | Volcan Tacana                         | 15.123741  | -92.119715  | MLZ  | M |
| CHIS | 37505    | Chiapas                | Volcan Tacana                         | 15.123741  | -92.119715  | MLZ  | M |
| CHIS | 37493    | Chiapas                | Volcan Tacana                         | 15.123741  | -92.119715  | MLZ  | M |
| CHIS | 36794    | Chiapas                | Volcan Tacana                         | 15.123741  | -92.119715  | MLZ  | M |
| CHIS | 37483    | Chiapas                | Volcan Tacana                         | 15.123741  | -92.119715  | MLZ  | M |
| CHIS | 45095    | Chiapas                | 5 mi SW Ciudad Las Casas              | 16.706187  | -92.689818  | MLZ  | M |
| CHIS | 272900   | Chiapas                | Cerro Male, Porvenir                  | 15.4508656 | -92.2334889 | MCZ  | M |
| CHIS | 272901   | Chiapas                | Cero Saxchanel, Sierra Madre          | 15.5050325 | -92.6057268 | MCZ  | M |
| CHIS | 394183   | (Country of Guatemala) | Santa Ilania                          | ND         | ND          | AMNH | M |
| CHIS | 74438    | (Country of Guatemala) | Volcán de Fuego                       | ND         | ND          | MCZ  | M |
| CHIS | 74437    | (Country of Guatemala) | Ridge above Calderas, Volcán de Fuego | ND         | ND          | MCZ  | M |
| CHIS | 113825   | (Country of Guatemala) | Guatemala                             | ND         | ND          | MCZ  | M |
| CHIS | 145864   | (Country of Guatemala) | Tecpam                                | ND         | ND          | MCZ  | M |
| CHIS | 145865   | (Country of Guatemala) | Santa Ilaina                          | ND         | ND          | MCZ  | M |
| CHIS | 193620   | (Country of Guatemala) | Zacapa, Usumatlán                     | ND         | ND          | MCZ  | M |
| CHIS | MOL13297 | Chiapas                | Cerro Huitepec                        | 16.73      | -92.68      | MZFC | F |
| CHIS | BONA90   | Chiapas                | Volcán Tacaná                         | 15.06      | -92.08      | MZFC | F |
| CHIS | BMM861   | Chiapas                | Volcán Tacaná, Papales                | -92.108333 | 15.13166667 | MZFC | F |
| CHIS | MOL13076 | Chiapas                | Cerro Huitepec                        | 16.73      | -92.68      | MZFC | F |
| CHIS | CRGA35   | Chiapas                | Cerro Boquerón                        | 15.23      | -92.3       | MZFC | F |

|      |         |                        |                              |            |             |      |   |
|------|---------|------------------------|------------------------------|------------|-------------|------|---|
| CHIS | EAGT828 | Chiapas                | Cerro Boquerón               | 15.23      | -92.3       | MZFC | F |
| CHIS | 44225   | Chiapas                | Tumbala                      | 17.279187  | -92.316808  | MLZ  | F |
| CHIS | 44224   | Chiapas                | Tumbala                      | 17.279187  | -92.316808  | MLZ  | F |
| CHIS | 37491   | Chiapas                | Volcan Tacana                | 15.123741  | -92.119715  | MLZ  | F |
| CHIS | 37511   | Chiapas                | Volcan Tacana                | 15.123741  | -92.119715  | MLZ  | F |
| CHIS | 37496   | Chiapas                | Volcan Tacana                | 15.123741  | -92.119715  | MLZ  | F |
| CHIS | 272899  | Chiapas                | Cero Male                    | 15.4508656 | -92.2334889 | MCZ  | F |
| CHIS | 272902  | Chiapas                | Cero Saxchanel, Sierra Madre | 15.5050325 | -92.6057268 | MCZ  | F |
| CHIS | 272903  | Chiapas                | Rodeo, Siltepec              | 15.4758643 | -92.2718298 | MCZ  | F |
| CHIS | 193619  | (Country of Guatemala) | Usumatlan, 8 mi NW           | ND         | ND          | MCZ  | F |
| CA   | 18_197  | Chalatenango           | Los Esesmiles                | ND         | ND          | BMC  | M |
| CA   | 18_198  | Chalatenango           | Los Esesmiles                | ND         | ND          | BMC  | M |
| CA   | 18_200  | Chalatenango           | Los Esesmiles                | ND         | ND          | BMC  | M |
| CA   | 18_233  | Chalatenango           | Los Esesmiles                | ND         | ND          | BMC  | M |
| CA   | 18_236  | Chalatenango           | Los Esesmiles                | ND         | ND          | BMC  | M |
| CA   | 18_489  | Chalatenango           | Los Esesmiles                | ND         | ND          | BMC  | M |
| CA   | 18_547  | Chalatenango           | Los Esesmiles                | ND         | ND          | BMC  | M |
| CA   | 18_563  | Chalatenango           | Los Esesmiles                | ND         | ND          | BMC  | M |
| CA   | 18302   | Ocotepeque             | Monte Verde                  | 14.5166664 | -88.7499962 | MLZ  | M |
| CA   | 18305   | Ocotepeque             | Monte Verde                  | 14.5166664 | -88.7499962 | MLZ  | M |
| CA   | 18306   | Ocotepeque             | Monte Verde                  | 14.5166664 | -88.7499962 | MLZ  | M |
| CA   | 18308   | Ocotepeque             | Monte Verde                  | 14.5166664 | -88.7499962 | MLZ  | M |
| CA   | 18301   | Ocotepeque             | Monte Verde                  | 14.5166664 | -88.7499962 | MLZ  | M |
| CA   | 18303   | Ocotepeque             | Monte Verde                  | 14.5166664 | -88.7499962 | MLZ  | M |
| CA   | 18307   | Ocotepeque             | Monte Verde                  | 14.5166664 | -88.7499962 | MLZ  | M |
| CA   | 18304   | Ocotepeque             | Monte Verde                  | 14.5166664 | -88.7499962 | MLZ  | M |
| CA   | 18309   | Ocotepeque             | Monte Verde                  | 14.5166664 | -88.7499962 | MLZ  | M |
| CA   | 18310   | Ocotepeque             | Monte Verde                  | 14.5166664 | -88.7499962 | MLZ  | M |

|    |        |                       |                     |            |             |     |   |
|----|--------|-----------------------|---------------------|------------|-------------|-----|---|
| CA | 25499  | La Paz                | El Caliche          | ND         | ND          | MLZ | M |
| CA | 16835  | Ocotepeque            | Montaña El Sillón   | 14.4010972 | -89.0833282 | MLZ | M |
| CA | 16836  | Ocotepeque            | Montaña El Sillón   | 14.4010972 | -89.0833282 | MLZ | M |
| CA | 17009  | Ocotepeque            | Montaña El Sillón   | 14.4010972 | -89.0833282 | MLZ | M |
| CA | 17007  | La Paz                | Montana La Cruz     | ND         | ND          | MLZ | M |
| CA | 17008  | La Paz                | Montana La Cruz     | ND         | ND          | MLZ | M |
| CA | 15584  | La Paz                | Montana La Cruz     | ND         | ND          | MLZ | M |
| CA | 16837  | Ocotepeque            | Montaña El Chorro   | 14.4333334 | -89.0833282 | MLZ | M |
| CA | 16834  | Ocotepeque            | Montaña El Chorro   | 14.4333334 | -89.0833282 | MLZ | M |
| CA | 15454  | Ocotepeque            | Monte El Candado    | 14.4333334 | -89.0499992 | MLZ | M |
| CA | 17099  | Ocotepeque            | Montaña El Portillo | 14.4666672 | -89.0666695 | MLZ | M |
| CA | 161254 | (Country of Honduras) | Montaña Vázquez     | ND         | ND          | MCZ | M |
| CA | 161256 | (Country of Honduras) | Montaña Vázquez     | ND         | ND          | MCZ | M |
| CA | 161257 | (Country of Honduras) | Montaña Vázquez     | ND         | ND          | MCZ | M |
| CA | 161258 | (Country of Honduras) | Montaña Vázquez     | ND         | ND          | MCZ | M |
| CA | 161259 | (Country of Honduras) | Montaña Vázquez     | ND         | ND          | MCZ | M |
| CA | 161260 | (Country of Honduras) | Montaña Vázquez     | ND         | ND          | MCZ | M |
| CA | 161261 | (Country of Honduras) | Montaña Vázquez     | ND         | ND          | MCZ | M |
| CA | 161262 | (Country of Honduras) | Montaña Vázquez     | ND         | ND          | MCZ | M |
| CA | 161263 | (Country of Honduras) | Montaña Vázquez     | ND         | ND          | MCZ | M |



|    |        |                       |                             |            |             |     |   |
|----|--------|-----------------------|-----------------------------|------------|-------------|-----|---|
| CA | 161265 | (Country of Honduras) | Cerro Cantoral              | ND         | ND          | MCZ | M |
| CA | 161268 | (Country of Honduras) | Cerro Cantoral              | ND         | ND          | MCZ | M |
| CA | 161270 | (Country of Honduras) | Cerro Cantoral              | ND         | ND          | MCZ | M |
| CA | 169855 | (Country of Honduras) | Cantoral                    | ND         | ND          | MCZ | M |
| CA | 161264 | (Country of Honduras) | Montaña Vázquez             | ND         | ND          | MCZ | M |
| CA | 161267 | (Country of Honduras) | Montaña Vázquez             | ND         | ND          | MCZ | M |
| CA | 161269 | (Country of Honduras) | Montaña Vázquez             | ND         | ND          | MCZ | M |
| CA | 158121 | (Country of Honduras) | Montaña Vázquez             | ND         | ND          | MCZ | M |
| CA | 265213 | (Country of Honduras) | Montaña Vázquez             | ND         | ND          | MCZ | M |
| CA | 18_194 | Chalatenango          | Los Esesmiles               | ND         | ND          | BMC | F |
| CA | 18_467 | Chalatenango          | Los Esesmiles, Chalatenango | ND         | ND          | BMC | F |
| CA | 18_468 | Chalatenango          | Los Esesmiles, Chalatenango | ND         | ND          | BMC | F |
| CA | 18_487 | Chalatenango          | Los Esesmiles, Chalatenango | ND         | ND          | BMC | F |
| CA | 18313  | Ocatepeque            | Monte Verde                 | 14.5166664 | -88.7499962 | MLZ | F |
| CA | 18312  | Ocatepeque            | Monte Verde                 | 14.5166664 | -88.7499962 | MLZ | F |
| CA | 18311  | Ocatepeque            | Monte Verde                 | 14.5166664 | -88.7499962 | MLZ | F |
| CA | 17098  | Ocatepeque            | Montaña El Portillo         | 14.4666672 | -89.0666695 | MLZ | F |
| CA | 17097  | Ocatepeque            | Montaña El Portillo         | 14.4666672 | -89.0666695 | MLZ | F |
| CA | 17011  | La Paz                | Montana La Cruz             | ND         | ND          | MLZ | F |
| CA | 16664  | La Paz                | Montana La Cruz             | ND         | ND          | MLZ | F |

|    |        |                       |                   |            |             |     |   |
|----|--------|-----------------------|-------------------|------------|-------------|-----|---|
| CA | 16842  | La Paz                | Montana La Cruz   | ND         | ND          | MLZ | F |
| CA | 16667  | La Paz                | Montana La Cruz   | ND         | ND          | MLZ | F |
| CA | 16668  | La Paz                | Montana La Cruz   | ND         | ND          | MLZ | F |
| CA | 16666  | Ocotepeque            | Montaña El Chorro | 14.4333334 | -89.0833282 | MLZ | F |
| CA | 169853 | (Country of Honduras) | Cerro Cantoral    | ND         | ND          | MCZ | F |
| CA | 169854 | (Country of Honduras) | Cerro Cantoral    | ND         | ND          | MCZ | F |

ND: No data.

BC: Biological Collection.

AMNH: The American Museum of Natural History.

BMC: The Donald R. Dickey Bird and Mammal Collection, University of California Los Angeles.

MCZ: The Museum of Comparative Zoology, Harvard University.

MLZ: The Moore Lab of Zoology, Occidental College.

MZFC: Museo de Zoología, Facultad de Ciencias (Alfonso L. Herrera), Universidad Nacional Autónoma de México.
