# Supplementary material for: Genetic and morphometric divergence in the Garnet-Throated Hummingbird Lamprolaima rhami (Aves: Trochilidae)
Source: PeerJ journal article supplement (doi:10.7717/peerj.5733), 2018-10-19
Supplement: S3.pdf [file S3.pdf]

### Supplemental Information S3

Primers and PCR protocols used in this study.

| Gene          | Primer name | Primer sequence                  | References                     | PCR protocol   |                                             |                |
|---------------|-------------|----------------------------------|--------------------------------|----------------|---------------------------------------------|----------------|
|               |             |                                  |                                | Denaturation   | Annealing (35X)                             | Extension      |
| ND2           | L5219       | CCCATACCCCGAAAAATGATG            | Sorenson <i>et al.</i> , 1999. | 1x 03:00(94°C) | 00:30(94°C),<br>00:30(54°C),<br>00:45(72°C) | 1x 10:00(72°C) |
| ND2           | H6313       | CTCTTATTTAAGGCTTTGAAGGC          |                                |                |                                             |                |
| ND4           | ND4         | CACCTATGACTACCAAAAGCTCATGTAGAAGC | Arévalo <i>et al.</i> , 1994.  | 1x 05:00(94°C) | 00:30(95°C),<br>00:30(55°C),<br>00:45(72°C) | 1x 07:00(72°C) |
| ND4           | LEU         | CATTACTTTTACTTGGATTTGCACCA       |                                |                |                                             |                |
| ATPase6 and 8 | CO2GQL      | GGACAATGCTCAGAAATCTGCGG          | Eberhard <i>et al.</i> , 2004  | 1x 03:00(94°C) | 00:30(94°C),<br>00:30(58°C),<br>00:45(72°C) | 1x 10:00(72°C) |
| ATPase6 and 8 | CO3HMH      | CATGGGCTGGGGTCTACTATGTG          |                                |                |                                             |                |
| CR            | ARCOIF      | AATTTTATGGTCTTTGTGTGTGAA         | González <i>et al.</i> 2011    | 1x 03:00(94°C) | 00:30(94°C),<br>00:30(50°C),<br>00:45(72°C) | 1x 10:00(72°C) |
| CR            | ARCOIR      | ACCCTAGCACAACTCGCACT             |                                |                |                                             |                |
| BFib          | BFib-17L2   | TGGGAGGTGAAGCAGCTAAGAAAAACAA     | Prychitko & Moore, 1997.       | 1x 10:00(94°C) | 01:00(92°C),<br>01:00(50°C),<br>01:00(72°C) | 1x 07:00(72°C) |
| BFib          | BFib-17U2   | CATCCATGCAGTTCTGGCAATTC          |                                |                |                                             |                |
| MUSK          | MUSK-F3     | GCTGTACTTCCATGCACTACAATG         | McGuire <i>et al.</i> , 2014.  | 1x 05:00(95°C) | 00:25(95°C),<br>00:25(50°C),<br>01:00(72°C) | 1x 07:00(72°C) |
| MUSK          | MUSK-R3     | ATCCTCAAATTTCCCGAATCAAG          |                                |                |                                             |                |
| ODC           | ODC-2F      | GCGTGCAAAGAAGACTTGACC            | McGuire <i>et al.</i> , 2014.  | 1x 03:00(94°C) | 00:30(94°C),<br>00:30(57°C),<br>00:30(72°C) | 1x 05:00(72°C) |
| ODC           | ODC-2R      | AGCCACCACCAATATCAAGC             |                                |                |                                             |                |
