# Supplementary material for: Genetic and morphometric divergence in the Garnet-Throated Hummingbird Lamprolaima rhami (Aves: Trochilidae)
Source: PeerJ journal article supplement (doi:10.7717/peerj.5733), 2018-10-19
Supplement: S4.pdf [file S4.pdf]

## Supplemental information S4

Lilliefors (Kolmogorov-Smirnov) results to test normality of the morphometric data.

|         |             | UNCORRECTED DATA |                  | CORRECTED DATA<br>(log-transformation) |                  |
|---------|-------------|------------------|------------------|----------------------------------------|------------------|
|         |             | D                | <i>p</i> -value  | D                                      | <i>p</i> -value  |
| MALES   | Bill length | 0.054972         | 0.4123           | 0.057592                               | 0.3394           |
|         | Bill width  | 0.06995          | 0.09483          | 0.096836                               | <b>0.002935</b>  |
|         | Bill depth  | 0.1015           | <b>0.001389</b>  | 0.082337                               | <b>0.02284</b>   |
|         | Wing chord  | 0.091529         | <b>0.006226</b>  | 0.10299                                | <b>0.001019</b>  |
|         | Tail length | 0.092575         | <b>0.00617</b>   | 0.1023                                 | <b>0.001372</b>  |
| FEMALES | Bill length | 0.081525         | 0.3631           | 0.074573                               | 0.5069           |
|         | Bill width  | 0.068054         | 0.6071           | 0.075687                               | 0.4343           |
|         | Bill depth  | 0.087028         | 0.2568           | 0.067232                               | 0.6603           |
|         | Wing chord  | 0.23253          | <b>7.92E-10</b>  | 0.21699                                | <b>1.72E-08</b>  |
|         | Tail length | 0.16319          | <b>0.0001559</b> | 0.15024                                | <b>0.0008004</b> |

Test of Wilcoxon/Mann-Whitney to evaluate differences between males and females.

|             | W    | <i>p</i> -value |
|-------------|------|-----------------|
| Bill length | 6035 | <b>3.63E-06</b> |
| Bill width  | 5843 | <b>0.004239</b> |
| Bill depth  | 7172 | <b>5.97E-12</b> |
| Wing chord  | 8327 | <b>2.20E-16</b> |
| Tail length | 7944 | <b>2.20E-16</b> |

Kruskall-Wallis tests to evaluate significant differences between paired geographic groups (SMO, GRO, CHIS, CA). *Below diagonal*: males, *above diagonal*: females. \**p*-value<0.05, \*\**p*-value<0.01. \*\*\**p*-value<0.001.

| Bill length | SMO     | GRO             | CHIS            | CA            |
|-------------|---------|-----------------|-----------------|---------------|
| SMO         | ---     | 3.5738          | 0.47915         | 2.633         |
| GRO         | 3.6541  | ---             | <b>7.8077**</b> | 0.28482       |
| CHIS        | 0.78686 | 1.1404          | ---             | <b>4.411*</b> |
| CA          | 0.03264 | <b>7.3222**</b> | 2.0731          | ---           |

| Bill width | SMO     | GRO     | CHIS    | CA              |
|------------|---------|---------|---------|-----------------|
| SMO        | ---     | 0.13414 | 0.20259 | <b>9.953**</b>  |
| GRO        | 1.9535  | ---     | 0.18922 | <b>7.6985**</b> |
| CHIS       | 0.55619 | 0.82187 | ---     | <b>7.7066**</b> |

|    |                 |                |                  |     |
|----|-----------------|----------------|------------------|-----|
| CA | <b>15.34***</b> | <b>4.6982*</b> | <b>12.269***</b> | --- |
|----|-----------------|----------------|------------------|-----|

| Bill depth | SMO              | GRO             | CHIS             | CA               |
|------------|------------------|-----------------|------------------|------------------|
| SMO        | ---              | <b>6.0137*</b>  | 1.6954           | <b>14.834***</b> |
| GRO        | <b>4.9483*</b>   | ---             | 1.9715           | <b>6.0147*</b>   |
| CHIS       | 0.12252          | <b>9.4637**</b> | ---              | <b>9.6839**</b>  |
| CA         | <b>13.908***</b> | 0.75679         | <b>22.012***</b> | ---              |

| Wing chord | SMO              | GRO              | CHIS             | CA              |
|------------|------------------|------------------|------------------|-----------------|
| SMO        | ---              | <b>12.942***</b> | 1.37227          | <b>7.1119**</b> |
| GRO        | 0.3494           | ---              | <b>15.785***</b> | <b>21.26***</b> |
| CHIS       | 0.055364         | 0.060538         | ---              | 1.5062          |
| CA         | <b>15.655***</b> | <b>7.6503**</b>  | <b>11.681***</b> | ---             |

| Tail length | SMO            | GRO             | CHIS             | CA               |
|-------------|----------------|-----------------|------------------|------------------|
| SMO         | ---            | <b>9.2154**</b> | 0.86099          | <b>9.6551**</b>  |
| GRO         | 3.4614         | ---             | <b>6.5611*</b>   | <b>19.203***</b> |
| CHIS        | <b>5.3036*</b> | 0.20569         | ---              | <b>11.884***</b> |
| CA          | 3.13           | <b>7.4467**</b> | <b>14.044***</b> | ---              |
